# Supplementary material for: PageRank-based identification of signaling crosstalk from transcriptomics data: the case of Arabidopsis thaliana
Source: Royal Society of Chemistry journal article supplement (doi:10.1039/c2mb05365a), 2012-02-10
Supplement: c2mb05365a.pdf [file c2mb05365a.pdf]

## Supplementary File 1 - Including the description of experiments which have been used in the paper

Nooshin Omranian<sup>\*a,b</sup>, Bernd Mueller-Roeber<sup>a</sup> and Zoran Nikoloski<sup>a,b</sup>

Received Xth XXXXXXXXXXXX 20XX, Accepted Xth XXXXXXXXXXXX 20XX

First published on the web Xth XXXXXXXXXXXX 200X

DOI: 10.1039/b000000x

The lists of all experiments for the four signals (nitrate, iron, sulfur and hormones) are given in the following tables. Microarrays selected for the analysis of fewer signals (see Supplementary file 2) are marked with # in Tables 1 to 4.

**Table 1** Nitrate experiments. The names of the microarray experiments, the number of chips and conditions, the average number of replicates in addition to the accession ids are shown in the respective columns. Experiments were imported from different sources

| Microarray Experiment Name                                                                                                                                                                     | # of Chips | # of Cond. | Avg. # of Rep. | Accession-ID          |
|------------------------------------------------------------------------------------------------------------------------------------------------------------------------------------------------|------------|------------|----------------|-----------------------|
| # Treatment of <i>Arabidopsis</i> with low concentration of nitrate                                                                                                                            | 8          | 4          | 2              | NASCARRAYS-479        |
| WT vs NR null mutant high nitrate concentration treatment                                                                                                                                      | 16         | 8          | 2              | NASCARRAYS-480        |
| # Genome-wide reprogramming of primary and secondary metabolism, protein synthesis, cellular growth processes, and the regulatory infrastructure of <i>Arabidopsis</i> in response to nitrogen | 14         | 6          | 2.3            | Scheible <sup>*</sup> |
| # Transcription profiling of <i>Arabidopsis</i> roots from plants grown in nutrient solutions with various concentrations of nitrate and sucrose                                               | 34         | 16         | 2.12           | E-MEXP-828            |
| # High resolution NO <sub>3</sub> response of <i>Arabidopsis</i> roots                                                                                                                         | 26         | 13         | 2              | GSE20044              |

<sup>\*</sup>Data kindly provided by Dr. Wolf-Ruediger Scheible, Max-Planck Institute of Molecular Plant Physiology, Potsdam, Germany. Experimental setup reported in [11].

<sup>a</sup> Address, Institute of Biochemistry and Biology, University of Potsdam, Karl-Liebknecht-Str. 24-25, 14476 Potsdam, Germany. Tel: 33 1977 2810; E-mail: omranian@uni-potsdam.de and bmr@uni-potsdam.de

<sup>b</sup> Address, Systems Biology and Mathematical Modeling, Max-Planck-Institute for Molecular Plant Physiology, Am Mühlenberg 1, 14476 Potsdam, Germany. Tel: 33 1567 8548; E-mail: Nikoloski@mpimp-golm.mpg.de

**Table 2** Iron deficiency experiments. The names of the microarray experiments, the number of chips and conditions, the average number of replicates in addition to the accession ids are included in the respective columns. All experiments were obtained from the GEO database

| Microarray Experiment Name                                                                                                    | # of Chips | # of Cond. | Avg. # of Rep. | Accession-ID |
|-------------------------------------------------------------------------------------------------------------------------------|------------|------------|----------------|--------------|
| # Expression analysis of the effect of protoplasting and FACS sorting in roots exposed to iron deficiency (-Fe)               | 6          | 2          | 3              | GSE10496     |
| Expression analysis of root developmental zones after iron deficiency (-Fe) treatment                                         | 16         | 8          | 2              | GSE10497     |
| # Expression analysis of root cell-types after iron deficiency (-Fe) treatment                                                | 16         | 5          | 3.2            | GSE10501     |
| # Time course expression analysis of the iron deficiency (-Fe) response in <i>Arabidopsis</i> roots Experiment Overall Design | 14         | 7          | 2              | GSE10502     |
| Expression analysis of the response to wild-type and <i>pye-1</i> mutants to iron sufficient or iron deficient conditions     | 8          | 4          | 2              | GSE21443     |
| # Early iron deficiency induced changes in <i>Arabidopsis</i> roots                                                           | 22         | 8          | 2.75           | GSE15189     |

**Table 3** Sulfur limitation experiments. The names of the microarray experiments, the number of chips and conditions, the average number of replicates in addition to the accession ids are included in the respective columns. Experiments were obtained from the ArrayExpress database

| Microarray Experiment Name                                                                             | # of Chips | # of Cond. | Avg. # of Rep. | Accession-ID |
|--------------------------------------------------------------------------------------------------------|------------|------------|----------------|--------------|
| # Transcription profiling of <i>Arabidopsis</i> response to sulfate limitation                         | 22         | 11         | 2              | E-GEOD-5688  |
| # Transcription profiling of <i>Arabidopsis</i> wild type seeds grown under sulfur-deficient condition | 4          | 2          | 2              | E-ATMX-1     |

**Table 4** Hormone experiments. The names of the microarray experiments, the number of chips and conditions, the average number of replicates in addition to the accession ids appear in the respective columns. Most of the experiments were obtained from the TAIR database

| Microarray Experiment Name                                                                           | # of Chips | # of Cond. | Avg. # of Rep. | Accession-ID |
|------------------------------------------------------------------------------------------------------|------------|------------|----------------|--------------|
| # AtGenExpress: ACC time course in wildtype seedlings                                                | 12         | 6          | 2              | TAIR-ME00334 |
| AtGenExpress: Zeatin time course in wildtype seedlings                                               | 12         | 6          | 2              | TAIR-ME00344 |
| # AtGenExpress: Methyl Jasmonate time course in wildtype seedlings                                   | 12         | 6          | 2              | TAIR-ME00337 |
| AtGenExpress: IAA time course in wildtype seedlings                                                  | 12         | 6          | 2              | TAIR-ME00336 |
| # AtGenExpress: ABA time course in wildtype seedlings                                                | 12         | 6          | 2              | TAIR-ME00333 |
| AtGenExpress: GA3 time course in wildtype and ga1-5 mutant seedlings                                 | 24         | 12         | 2              | TAIR-ME00343 |
| AtGenExpress: Brassinolide time course in wildtype and det2-1 mutant seedlings                       | 24         | 12         | 2              | TAIR-ME00335 |
| AtGenExpress: Effect of Brassinosteroids on seedlings                                                | 26         | 13         | 2              | TAIR-ME00352 |
| AtGenExpress: Cytokinin treatment of seedlings                                                       | 12         | 4          | 3              | TAIR-ME00356 |
| # AtGenExpress: Effect of ABA during seed imbibition                                                 | 8          | 4          | 2              | TAIR-ME00351 |
| AtGenExpress: Basic hormone treatment of seeds                                                       | 12         | 6          | 2              | TAIR-ME00350 |
| AtGenExpress: Effect of gibberellic acid inhibitors on seedlings                                     | 20         | 10         | 2              | TAIR-ME00357 |
| AtGenExpress: Effect of auxin inhibitors on seedlings                                                | 10         | 5          | 2              | TAIR-ME00358 |
| AtGenExpress: Effect of brassinosteroid inhibitors on seedlings                                      | 16         | 8          | 2              | TAIR-ME00359 |
| AtGenExpress: Effect of ethylene inhibitors on seedlings                                             | 6          | 3          | 2              | TAIR-ME00360 |
| AtGenExpress: Effect of ibuprofen, salicylic acid and daminozide on seedlings                        | 8          | 4          | 2              | TAIR-ME00364 |
| Cytokinin treatment on roots of seedlings                                                            | 12         | 4          | 3              | GSE20232     |
| Cytokinin treatment on aerial parts of seedlings                                                     | 12         | 4          | 3              | GSE6832      |
| Gibberellin and ethylene cross-talk at the level of transcriptional regulation in <i>Arabidopsis</i> | 18         | 9          | 2              | GSE6150      |
| Transcript profiling of auxin/cytokinin crosstalk in the <i>Arabidopsis</i> primary root apex        | 14         | 6          | 2.3            | GSE20231     |
